# Supplementary material for: Synthesis of gold nanoparticle-loaded magnetic carbon microsphere based on reductive and binding properties of polydopamine for recyclable catalytic applications
Source: Royal Society of Chemistry journal article supplement (doi:10.1039/d0nj03216f), 2020-01-01
Supplement: d0nj03216f1.pdf [file d0nj03216f1.pdf]

**Synthesis of gold nanoparticles loaded magnetic carbon microsphere  
based on reductive and binding property of polydopamine for  
recyclable catalytic applications**

Qiang Xu, Taiping Gao\*, Shengxiao Zhang\*, Mingming Zhang, Xin Li, Xia Liu

*School of Chemistry and Materials Science, Ludong University, Yantai 264025, P.R. China*

E-mail: gaotp@ldu.edu.cn

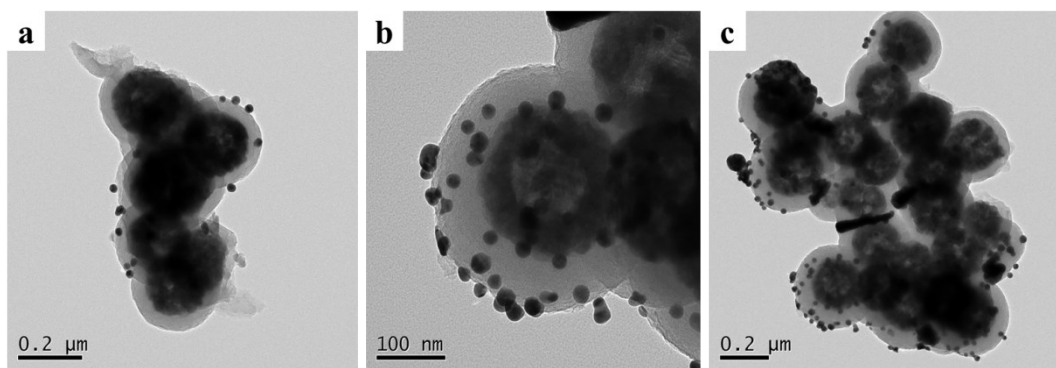

**Fig. S1** TEM images of  $\text{Fe}_3\text{O}_4@\text{C-Au}(1\%)$ (a),  $\text{Fe}_3\text{O}_4@\text{C-Au}(5\%)$ (b),  $\text{Fe}_3\text{O}_4@\text{C-Au}(7\%)$ (c).

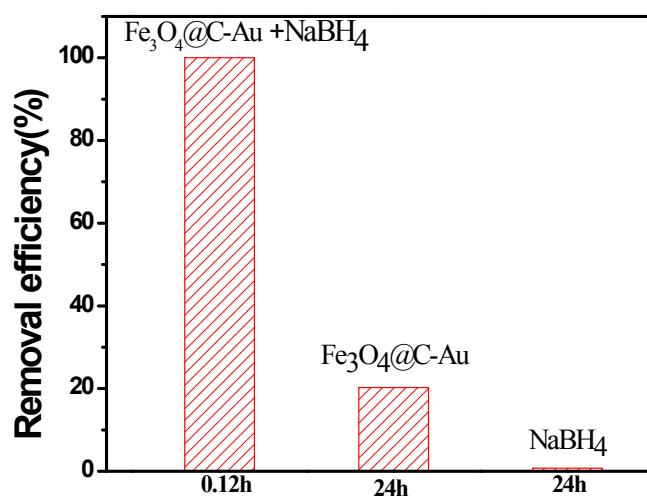

**Fig. S2** The effect of different reaction systems on the removal efficiency of 4-NP.

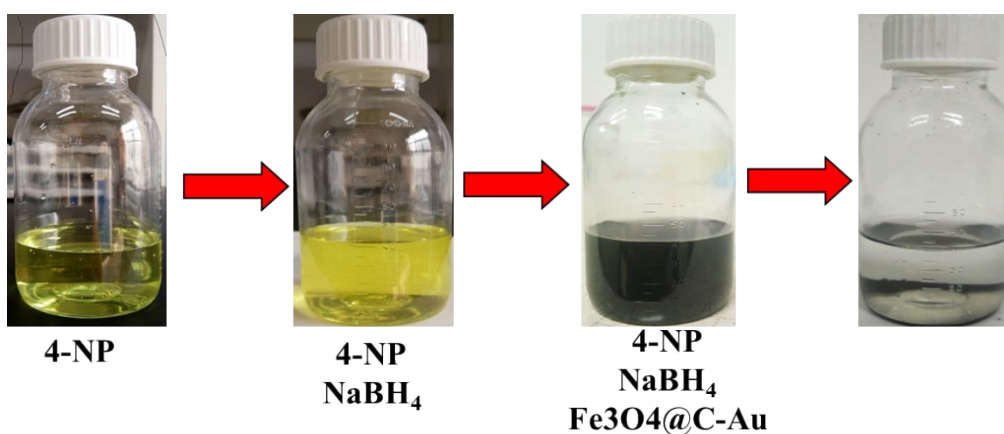

**Fig. S3** The colour change of  $\text{Fe}_3\text{O}_4@\text{C-Au}$  catalyzed the reduction of 4-nitrophenol.

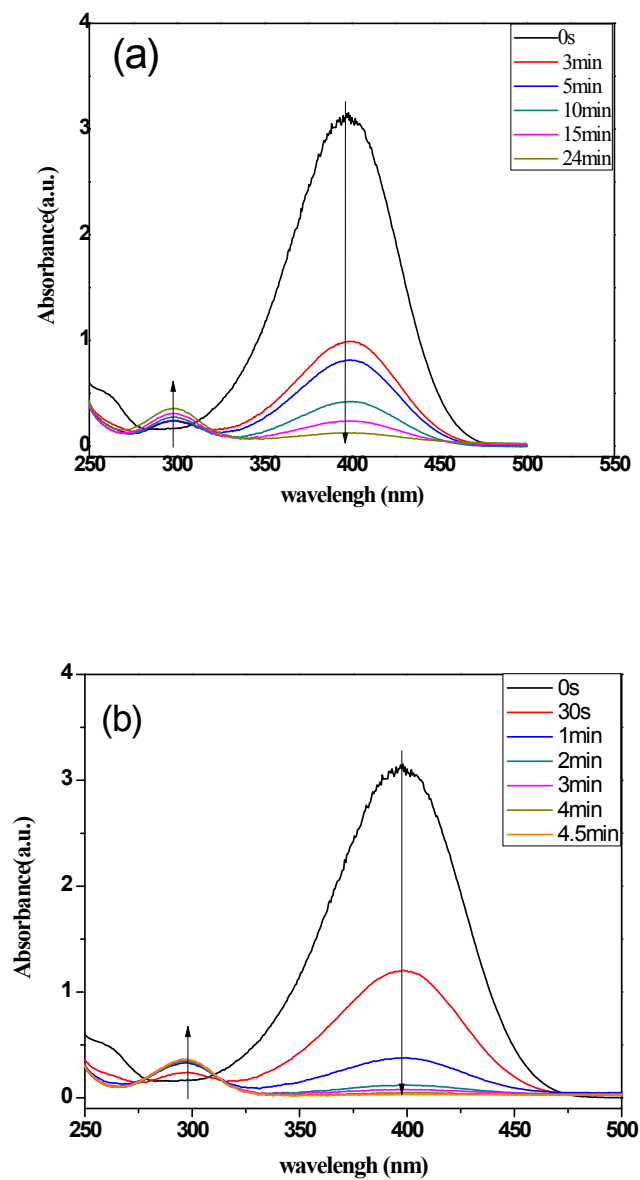

**Fig. S4** Time-dependent UV-vis absorption spectra of the reduction of 4-nitrophenol catalyzed by Fe<sub>3</sub>O<sub>4</sub>@C-Au(1%) (a) and Fe<sub>3</sub>O<sub>4</sub>@C-Au(7%) (b).
